# Supplementary material for: Evaluation of the HIV-1 Polymerase Gene Sequence Diversity for Prediction of Recent HIV-1 Infections Using Shannon Entropy Analysis
Source: MDPI journal article supplement (doi:10.3390/v14071587), 2022-07-21
Supplement: s1 [file s1]

## E628 and R629 – Study sequences

## Recent HIV

## Chronic HIV

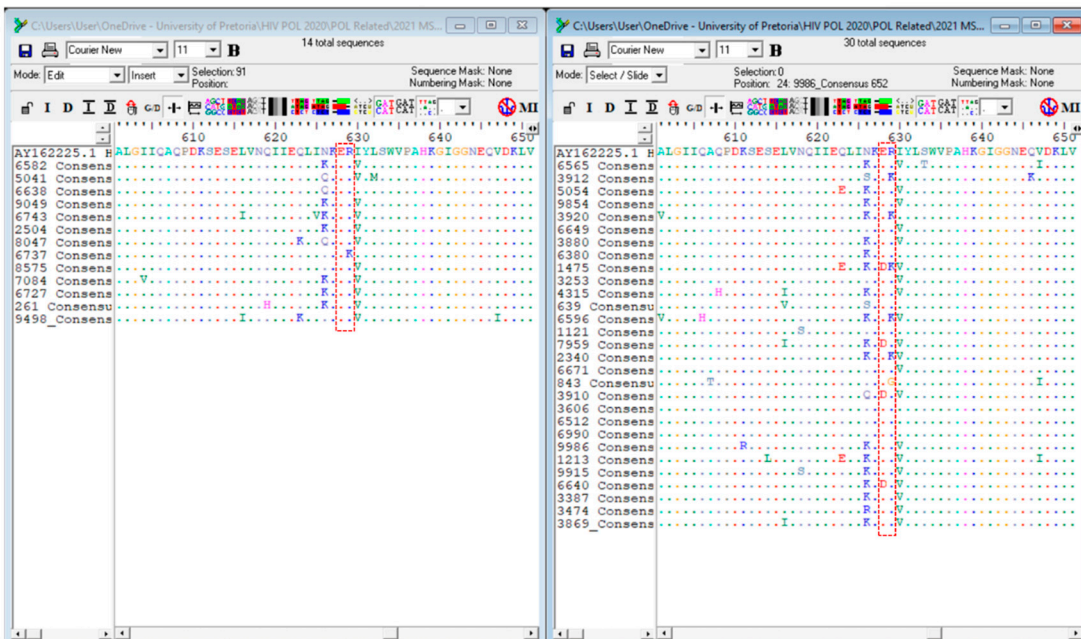

## E628 and R629 – Subtype A sequences

## Recent HIV

## Chronic HIV

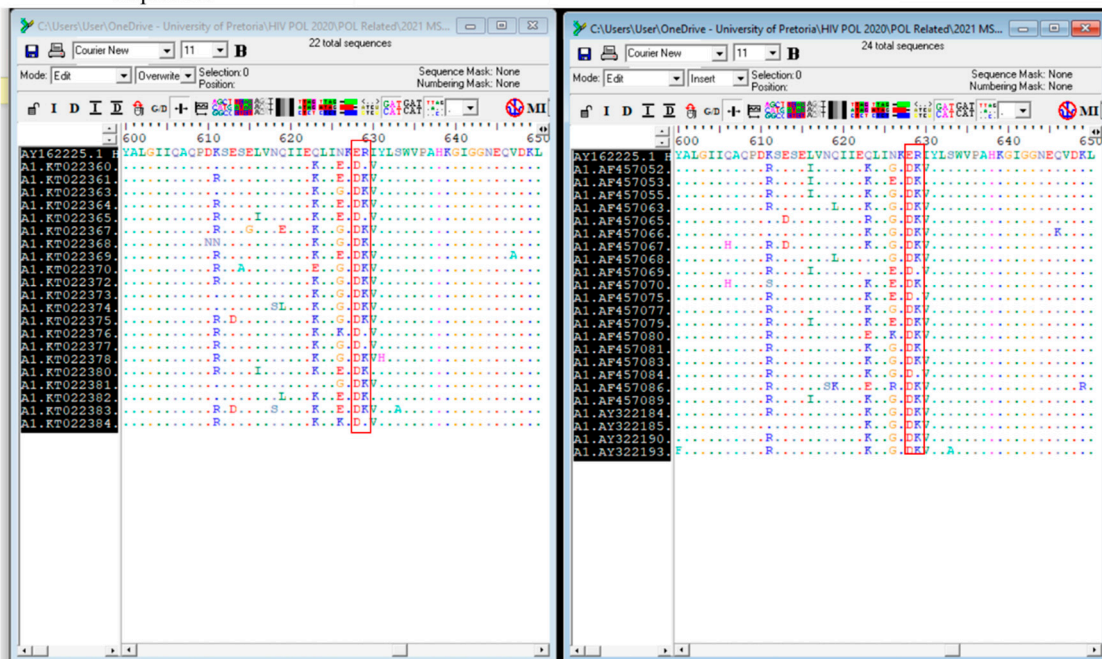

### E628 and R629 – Subtype B sequences

### Recent HIV

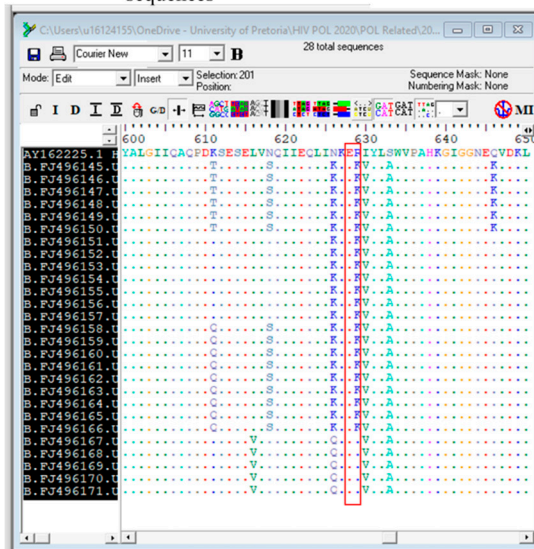

### Chronic HIV

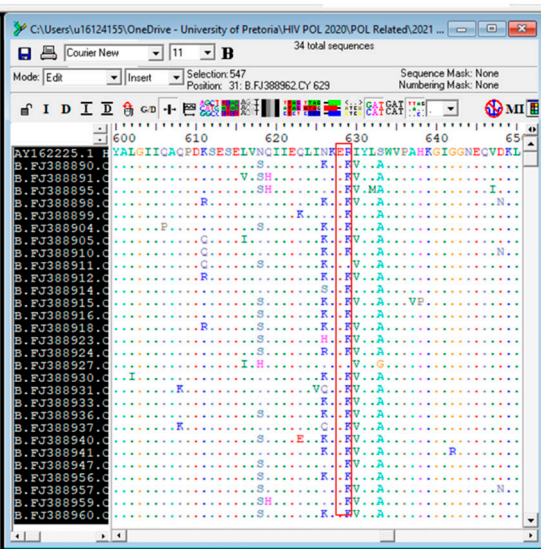

### E628 and R629 – Subtype D sequences

### Recent HIV

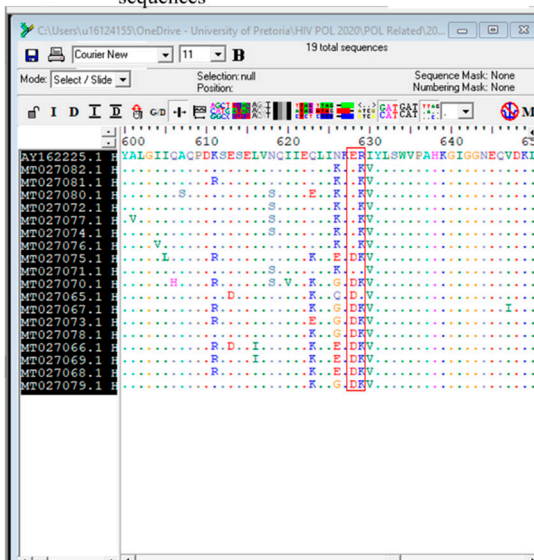

### Chronic HIV

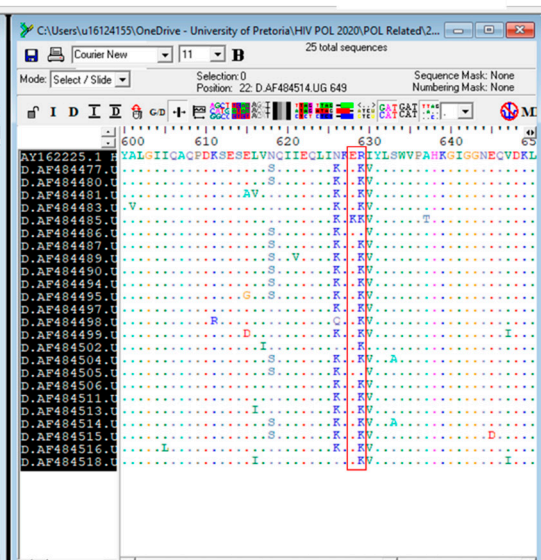

**Supplementary Figure S2:** Comparison of differences in amino acids E628 and R629 in study sequences and non-subtype C reference sequences, for recent and chronic sequences. For some of the non-subtype C references, the amino acid mutations were found to belong to the wild type of the reference sequence.
