# Supplementary material for: Evaluation of the HIV-1 Polymerase Gene Sequence Diversity for Prediction of Recent HIV-1 Infections Using Shannon Entropy Analysis
Source: MDPI journal article supplement (doi:10.3390/v14071587), 2022-07-21
Supplement: s1 [file s1]

**Supplementary Table S2:** Nucleotide differences within amino acid mutations found to have a different distribution between recent and chronic infection sequences

|                |           | IT   |      |      | ER   |      |      |      | EL   |      |      |      |
|----------------|-----------|------|------|------|------|------|------|------|------|------|------|------|
| Sample         | HIV Stage | I240 | M456 | T499 | E531 | E548 | E628 | R629 | E670 | E684 | I690 | L704 |
| Codon sequence |           | ATT  | ATG  | ACA  | GAA  | GAA  | GAG  | AGA  | GAG  | GAG  | ATA  | CTA  |
| 261            | R         |      |      |      |      |      |      | --G  |      |      |      |      |
| 2504           | R         |      | -G-  |      |      |      | --A  |      |      |      | G--  |      |
| 5041           | R         |      |      |      |      |      | --A  |      |      |      |      |      |
| 6512           | R         |      |      |      |      |      | --A  |      |      |      |      |      |
| 6727           | R         |      |      |      |      |      | --A  | --G  |      |      |      |      |
| 6638           | R         |      |      |      |      |      | --A  | --G  | --T  |      |      |      |
| 6582           | R         |      |      |      |      |      | --A  |      |      |      |      |      |
| 9498           | R         |      |      |      |      |      | --A  | --G  |      | --T  |      | --G  |
| 9049           | R         |      |      | -T-  |      |      | --A  | --G  |      |      |      |      |
| 8575           | R         | --C  | -G-  | -T-  |      |      | --A  | --G  |      | --T  |      |      |
| 8047           | R         |      |      |      |      |      | --A  | --G  |      | --A  | G--  |      |
| 7084           | R         |      | GG-  |      |      |      | --A  | --G  | --T  | --A  |      |      |
| 6743           | R         |      |      |      |      |      | --A  | --G  |      |      |      |      |
| 6737           | R         |      |      |      |      |      | --A  | -A-  |      | --A  |      |      |
| 639            | Chr       |      |      |      | --C  |      | --A  |      |      |      |      | -AG  |
| 843            | Chr       |      | -GA  |      |      | --T  | --A  | G--  |      |      |      |      |
| 1121           | Chr       |      |      | --G  | --G  | --C  | --A  |      | --T  | --A  |      |      |
| 1213           | Chr       |      |      |      |      | --T  |      | --G  |      |      |      |      |
| 1475           | Chr       |      | -G-  | -T-  |      | --T  | --C  | -AG  |      | --A  |      | A--  |
| 2340           | Chr       |      |      |      |      |      | --A  | -AG  |      | --T  |      |      |
| 2696           | Chr       |      |      |      |      |      | --A  |      |      |      |      |      |
| 3253           | Chr       |      |      |      | --C  |      | --A  | -AG  | --A  | --C  |      |      |
| 3387           | Chr       |      |      |      |      | --C  | --A  | --G  | --A  |      |      | T--  |
| 3474           | Chr       |      | -G-  |      |      |      | --A  | --G  | --T  |      |      |      |
| 9986           | Chr       | G--  | -G-  |      |      |      | --A  | --G  |      |      |      |      |

|      |     |     |     |     |     |     |     |     |     |     |     |
|------|-----|-----|-----|-----|-----|-----|-----|-----|-----|-----|-----|
| 3606 | Chr | --C |     |     |     | --G | --A |     |     |     | -A- |
| 3869 | Chr |     | -G- |     |     |     | --A | --G |     |     |     |
| 3880 | Chr |     |     |     |     |     | --A | --G | --C | --A | A-- |
| 3910 | Chr |     |     |     | --C |     | --C | -AG | --A |     |     |
| 3912 | Chr |     |     |     |     | --G | --A | -A- | --C |     |     |
| 3920 | Chr |     | -G- |     |     |     | --A | -AG | --A |     |     |
| 4351 | Chr | G-- | -G- |     |     |     | --A | --G |     |     |     |
| 4198 | Chr |     |     |     |     |     | --A |     |     |     |     |
| 5054 | Chr |     | -GA |     |     |     | --A | --G |     |     |     |
| 6380 | Chr | G-- |     |     |     |     | --A |     |     |     | T-- |
| 6565 | Chr |     |     |     |     |     | --A |     | --T |     |     |
| 6671 | Chr |     |     | G-G |     | --C | --C | -AG | --T |     |     |
| 6649 | Chr |     | -G- | -T- |     |     | --A | --G |     |     |     |
| 6640 | Chr |     |     | --T | --C |     | --T | -AG | --A |     | -A- |
| 6596 | Chr |     |     |     |     |     | --A | -AG | --A |     |     |
| 9915 | Chr |     |     |     |     |     | --A | --G | --T |     | --G |
| 9895 | Chr |     |     |     |     |     | --A | --G |     |     |     |
| 9854 | Chr |     | -G- |     |     |     | --A |     | --T |     | -A- |
| 7959 | Chr | G-- | -G- | GT- | --G |     | --A | --G | --T | --T |     |
| 6990 | Chr |     |     | -TG |     |     | --A | --G |     |     | T-- |

---

Different groups of amino acid mutations (ER, EL and IT) were named based on the first and last amino acid of the group. HIV = Human immunodeficiency virus; R = recent HIV infection; Chr = chronic HIV infection; A = adenine; G = guanine; T = thymine; C = cytosine
