# Supplementary material for: Evaluation of the HIV-1 Polymerase Gene Sequence Diversity for Prediction of Recent HIV-1 Infections Using Shannon Entropy Analysis
Source: MDPI journal article supplement (doi:10.3390/v14071587), 2022-07-21
Supplement: s1 [file s1]

**Supplementary Table S1:** List of articles from which HIV-1 subtype C reference sequences were obtained

| Authors                 | Year | Fiebig staging | Method used to diagnose stage of infection | Enzyme used for amplification   | Country                | Accession numbers                           |
|-------------------------|------|----------------|--------------------------------------------|---------------------------------|------------------------|---------------------------------------------|
| Recent HIV articles     |      |                |                                            |                                 |                        |                                             |
| Treurnicht <i>et al</i> | 2010 | I - IV         | RNA + p24 + EIA + WB                       | Expand high fidelity polymerase | South Africa           | GQ999972 – GQ999991                         |
| Manak <i>et al</i>      | 2012 | I - IV         | RNA + p24 + EIA + WB                       | Platinum Taq DNA polymerase     | South Africa           | JN687620 – JN687651                         |
| Parrish <i>et al</i>    | 2012 | I - III        | RNA + p24 + EIA + WB                       | Platinum Taq DNA polymerase     | Malawi                 | KC149260 – KC149450                         |
| Sanchez <i>et al</i>    | 2014 | IV - V         | RNA + p24 + EIA + WB                       | Platinum Taq DNA polymerase     | India                  | KP109480 – KP109489;<br>KX069219 – KX069228 |
| *Song <i>et al</i>      | 2018 | Unknown        | Unclear                                    | Platinum Taq DNA polymerase     | South Africa, Malawi   | MF501044 – MF501081                         |
| Chronic HIV articles    |      |                |                                            |                                 |                        |                                             |
| Matthews <i>et al</i>   | 2008 | N/A            | Days post seroconversion                   | Unknown                         | South Africa           | FJ199915 – FJ199992                         |
| Parrish <i>et al</i>    | 2012 | N/A            | N/A                                        | Platinum Taq DNA polymerase     | Malawi                 | KC156299 – KC156499                         |
| Novitsky                | 1999 | N/A            | Days post seroconversion                   | Expand high fidelity polymerase | Botswana               | AF110959 – AF110981                         |
| *Ojwach <i>et al</i>    | 2018 | N/A            | Days post infection                        | TaKaRa Ex Taq polymerase        | South Africa, Botswana | MH487430 – MH487469                         |

Song *et al* sequences had a lot of ambiguous bases and were not used for analysis

Ojwach *et al* sequences were only for protease and reverse transcriptase, they were also not used for analysis
