# Supplementary material for: Evaluation of the HIV-1 Polymerase Gene Sequence Diversity for Prediction of Recent HIV-1 Infections Using Shannon Entropy Analysis
Source: MDPI journal article supplement (doi:10.3390/v14071587), 2022-07-21
Supplement: s1 [file s1]

1-50 window p=0,4997

Recent HIV

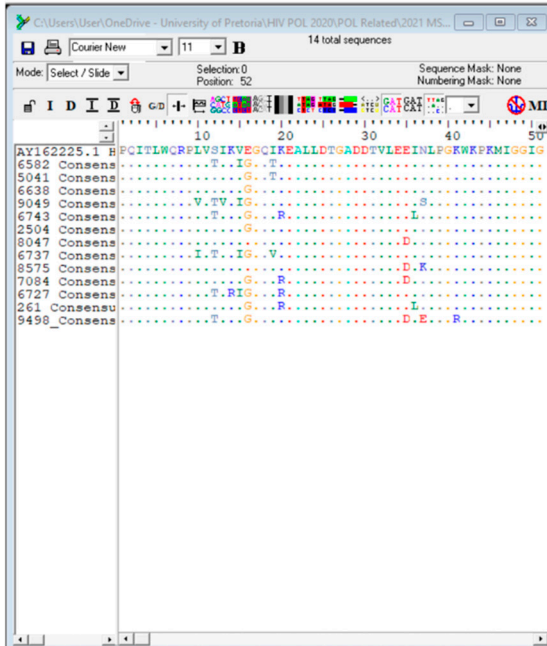

Chronic HIV

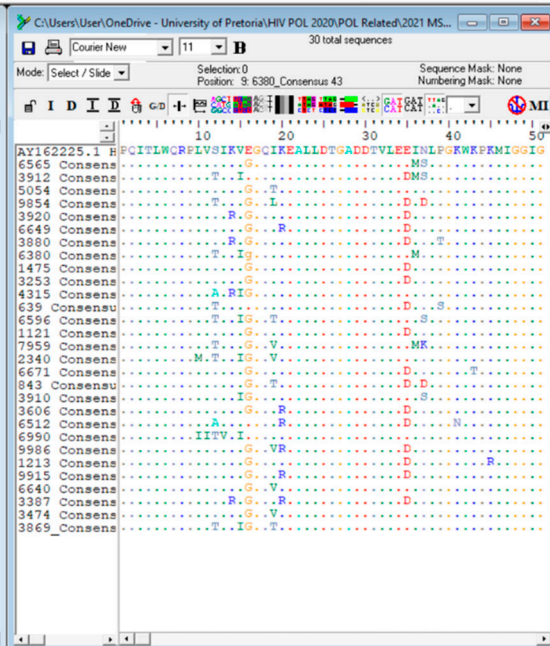

51-100 window p=0,0115

Recent HIV

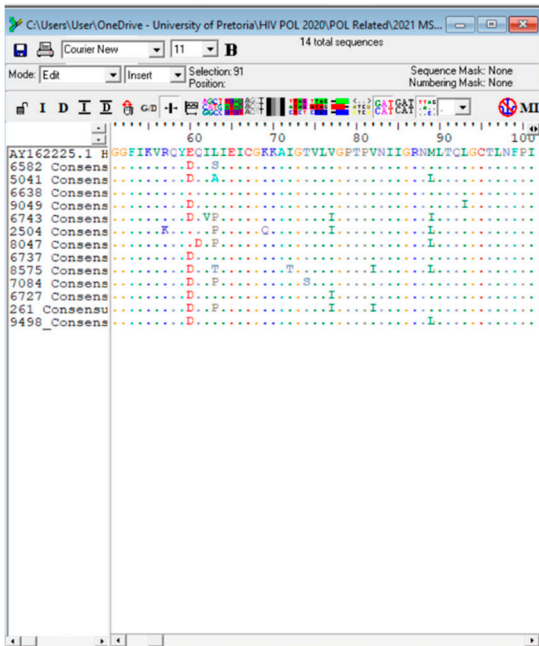

Chronic HIV

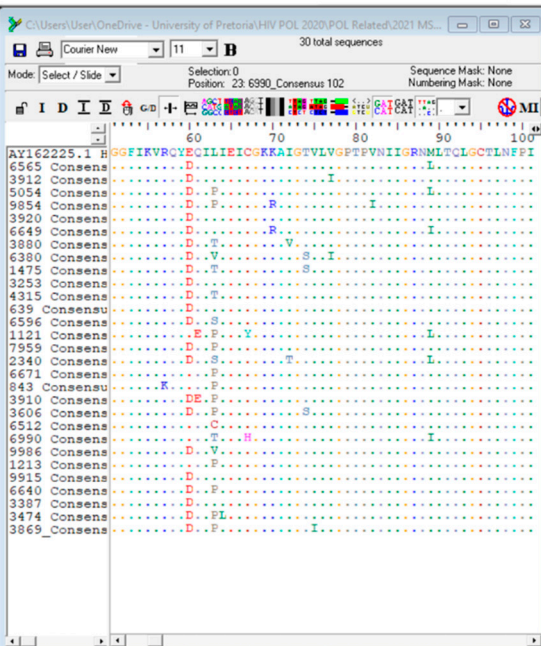

101-150 window  $p=0,0580$

Recent HIV

Chronic HIV

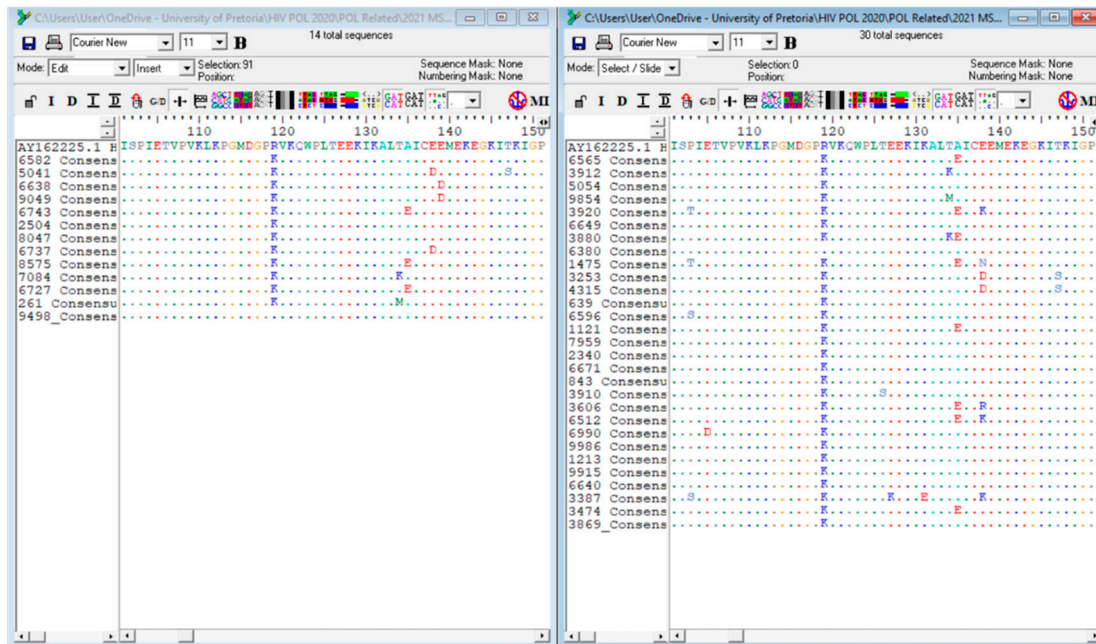

151-200 window  $p=0,0134$

Recent HIV

Chronic HIV

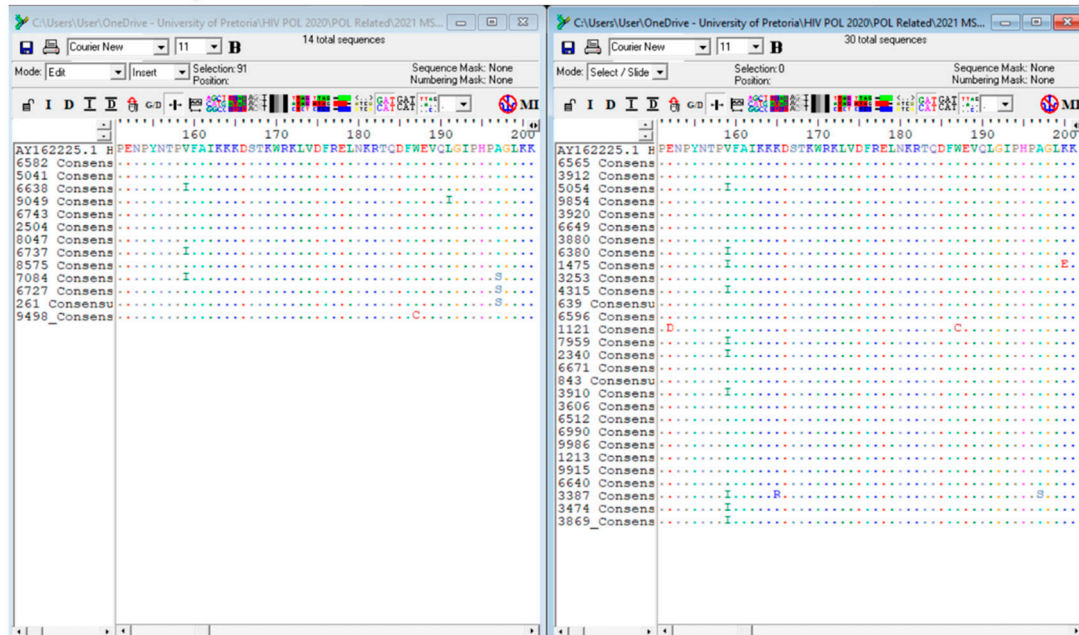

201-250 window  $p=0,0003$

Recent HIV

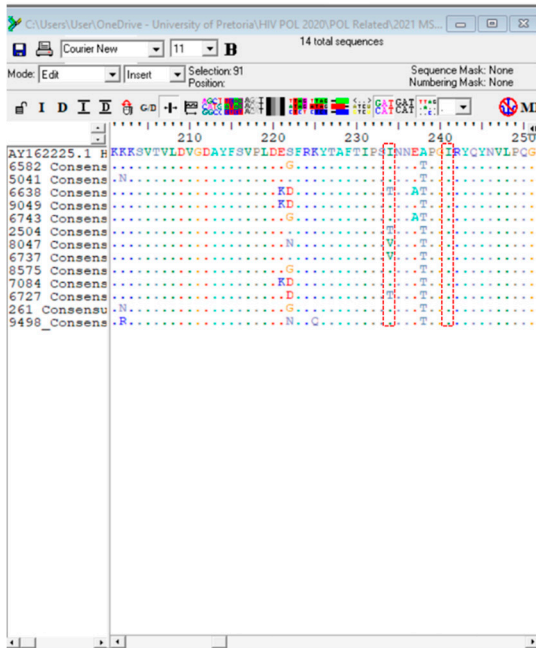

Chronic HIV

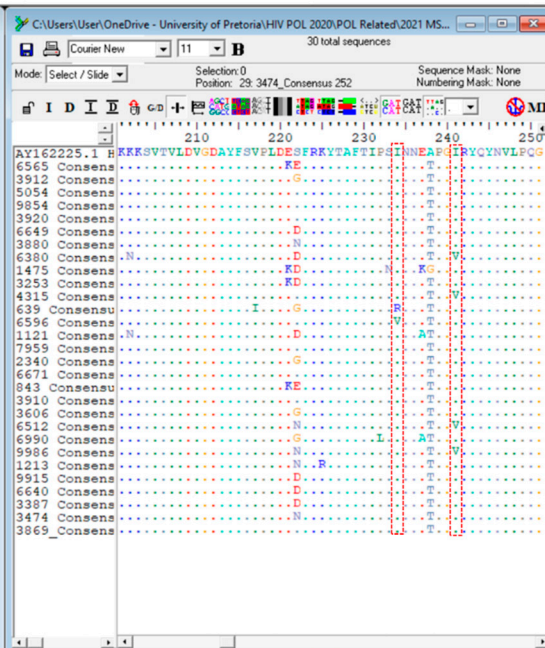

251-300 window  $p=0,1903$

Recent HIV

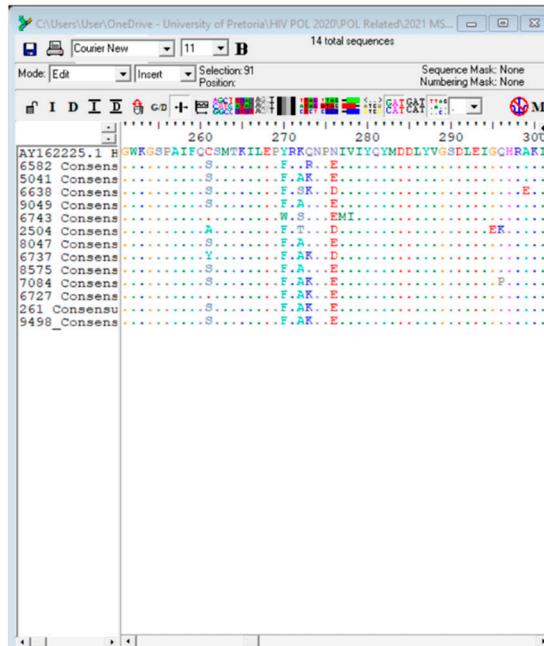

Chronic HIV

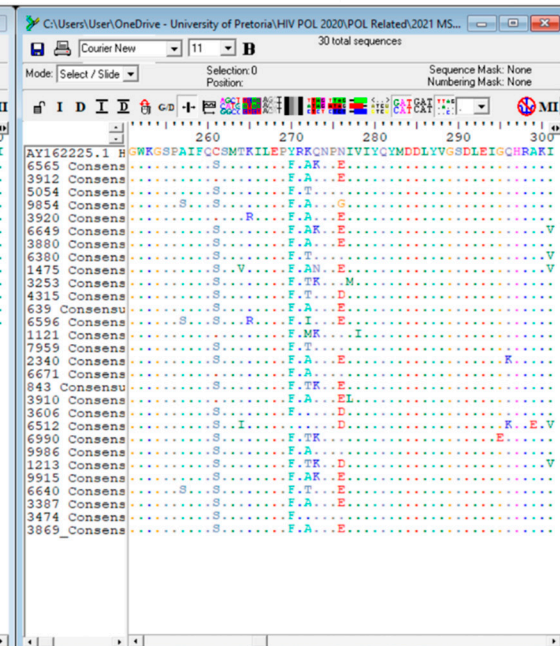



301-350 window p=0,0004

Recent HIV

Chronic HIV

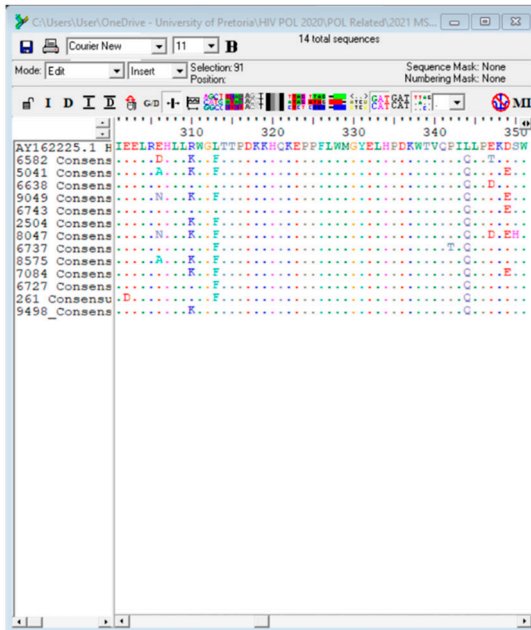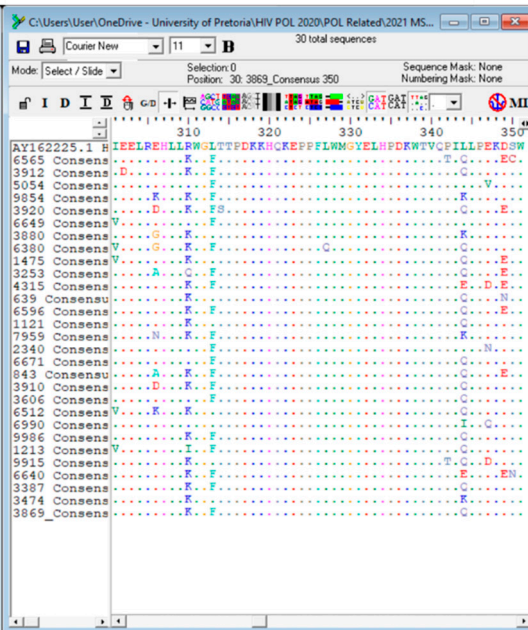

351-400 window p=0,0093

Recent HIV

Chronic HIV

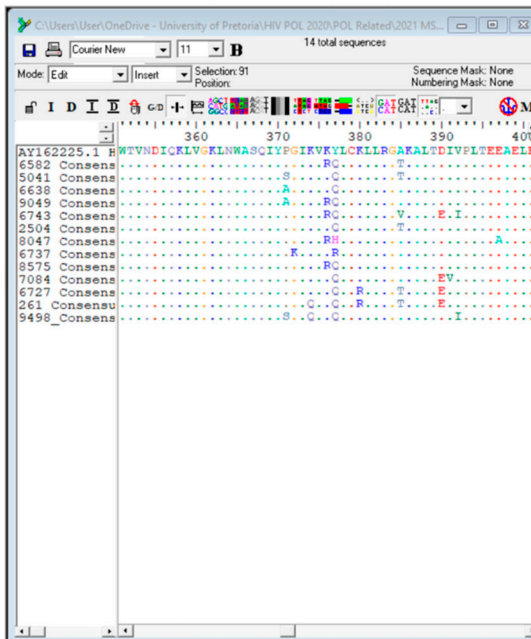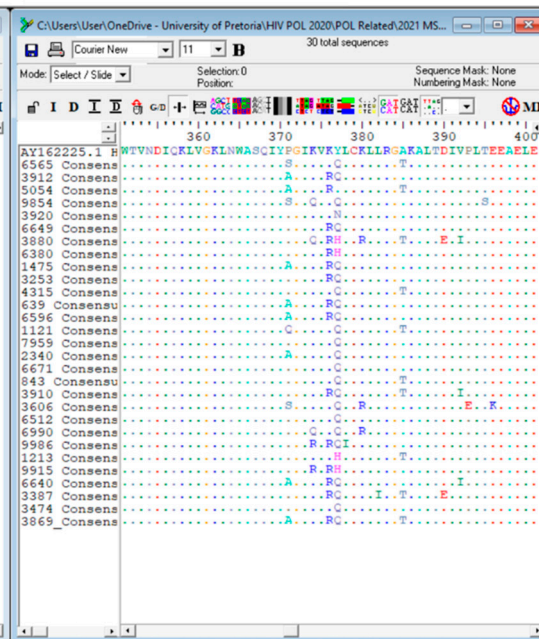



401-450 window p=0,0226

Recent HIV

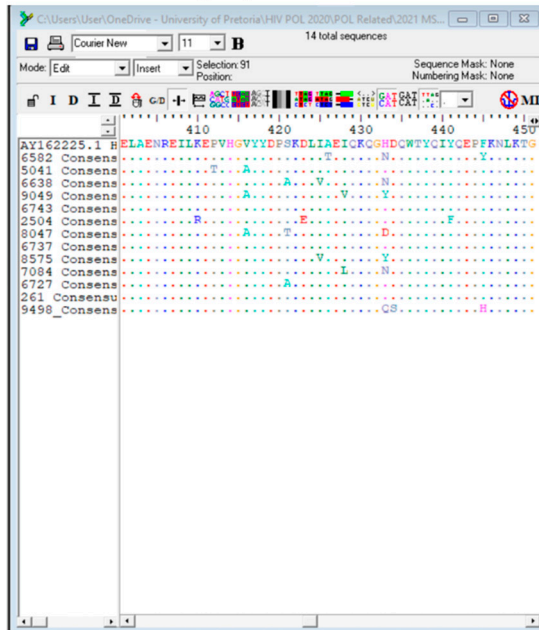

Chronic HIV

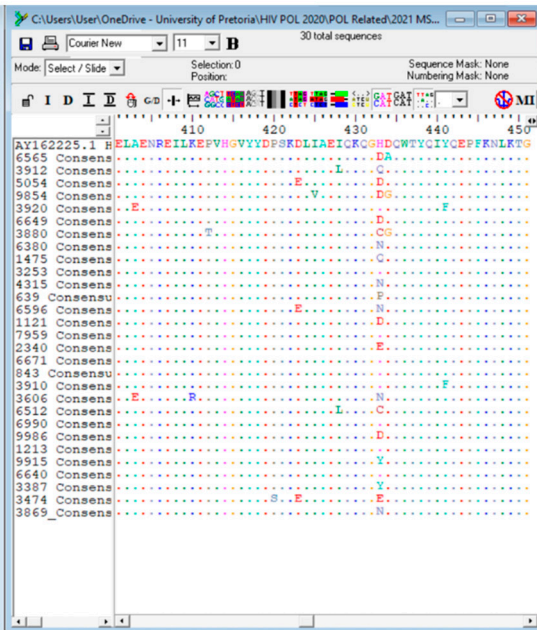

451-500 window p=0,0023

Recent HIV

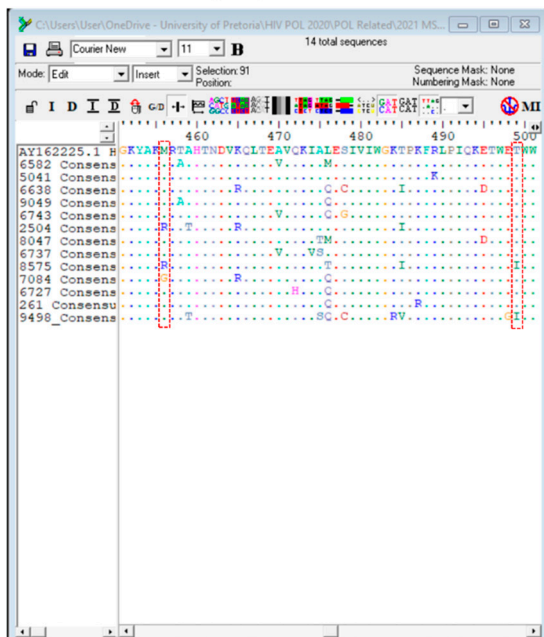

Chronic HIV

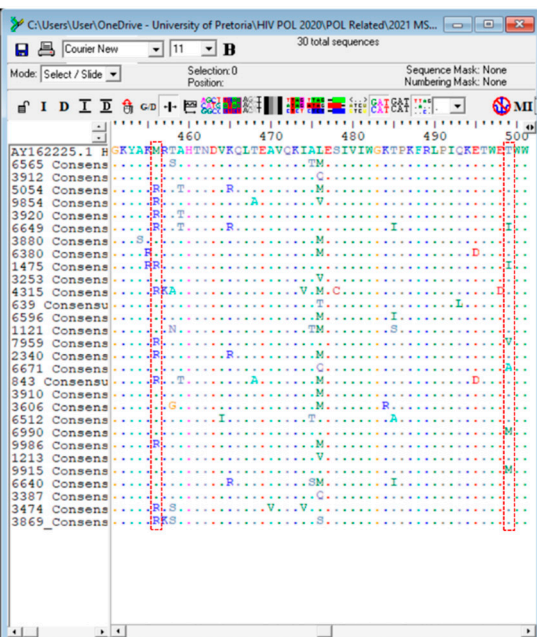

501-550 window p=0,0078

Recent HIV

Chronic HIV

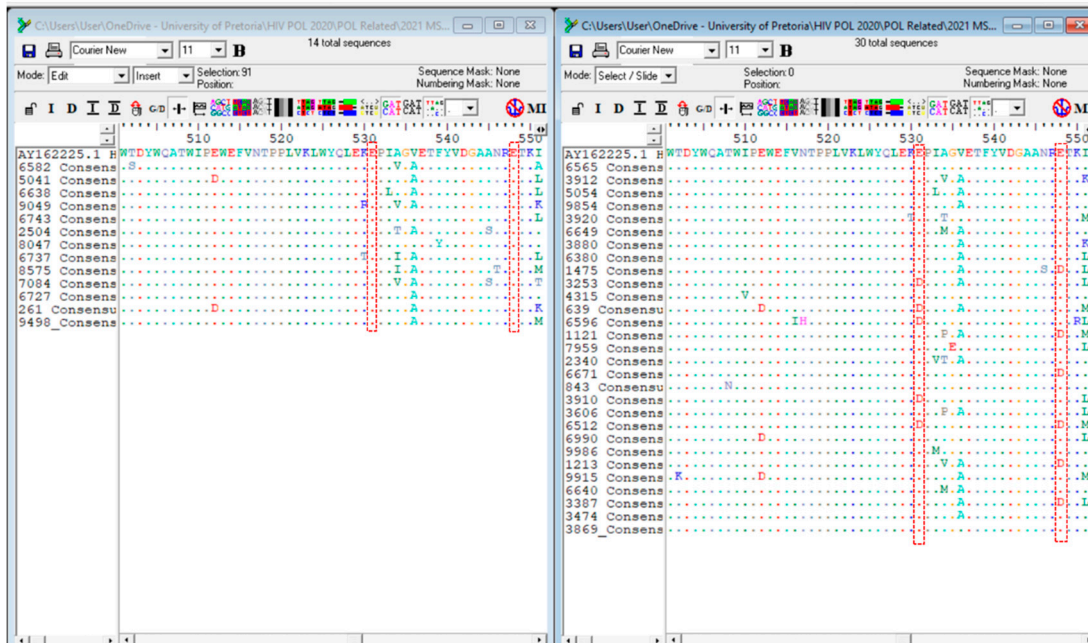

551-600 window p=0,0894

Recent HIV

Chronic HIV

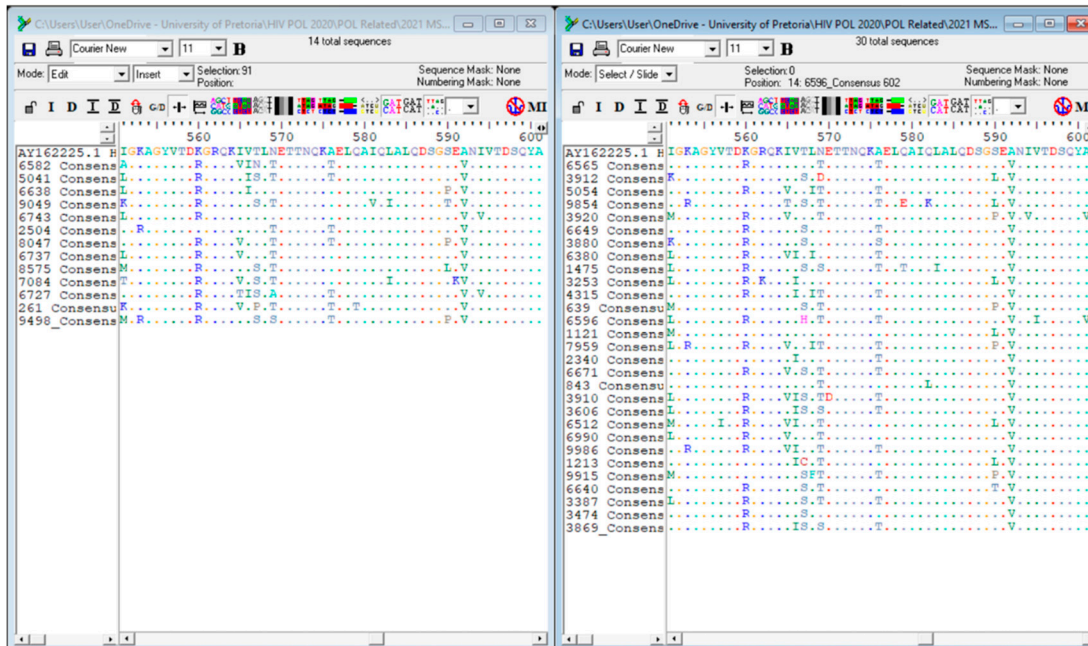

601-650 window  $p=0,0010$

Recent HIV

Chronic HIV

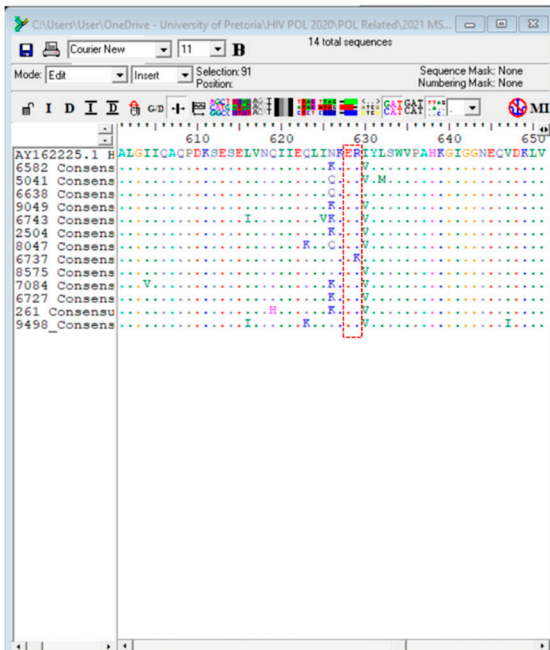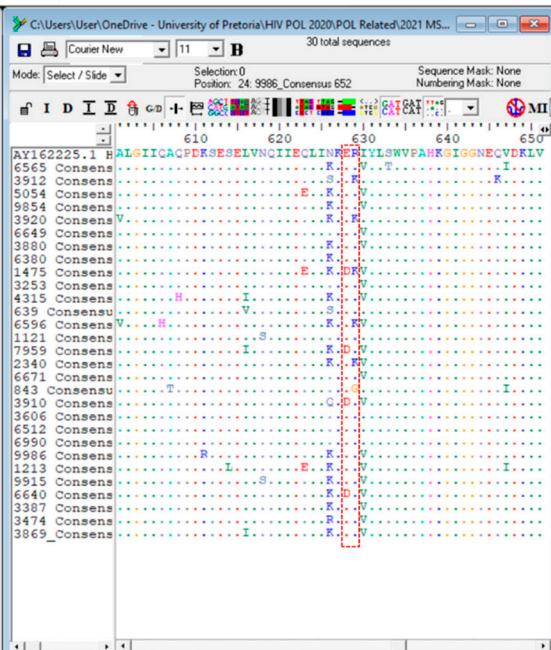

651-700 window  $p=0,0033$

Recent HIV

Chronic HIV

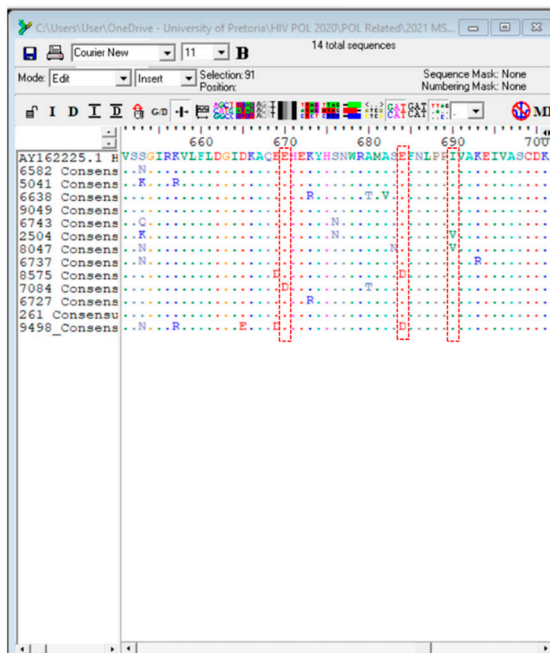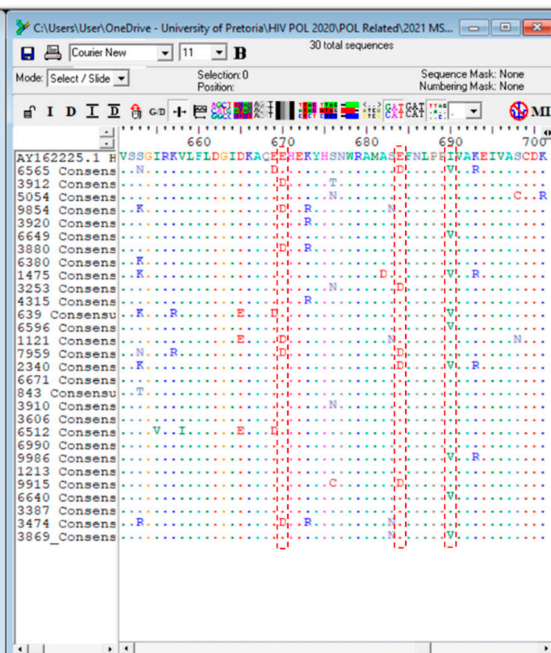



701-750 window  $p=0,0001$

Recent HIV

Chronic HIV

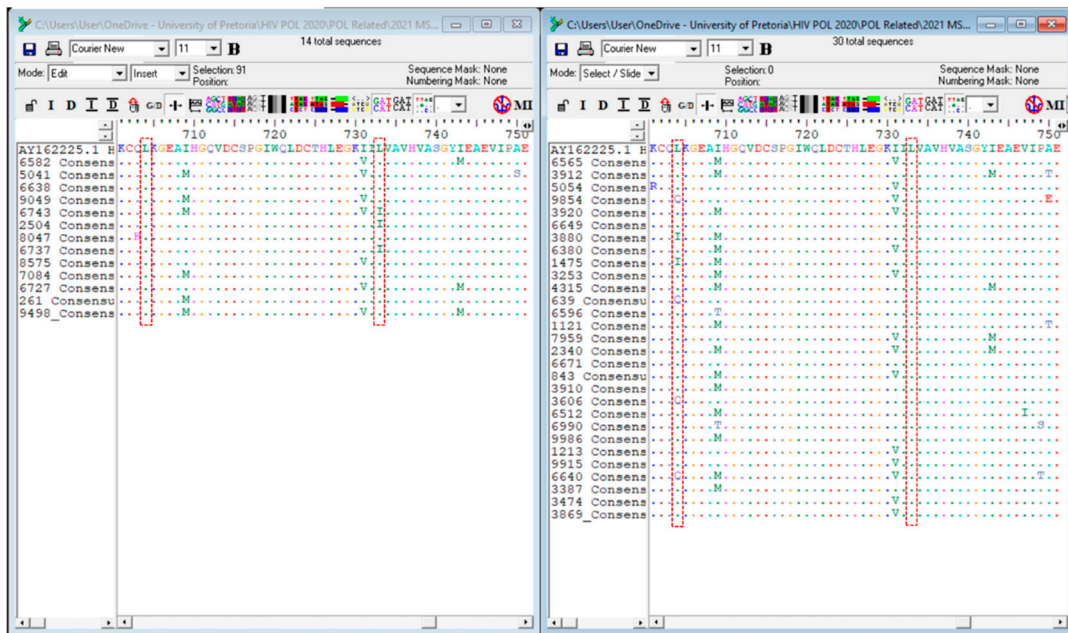

751-800 window  $p=0,0648$

Recent HIV

Chronic HIV

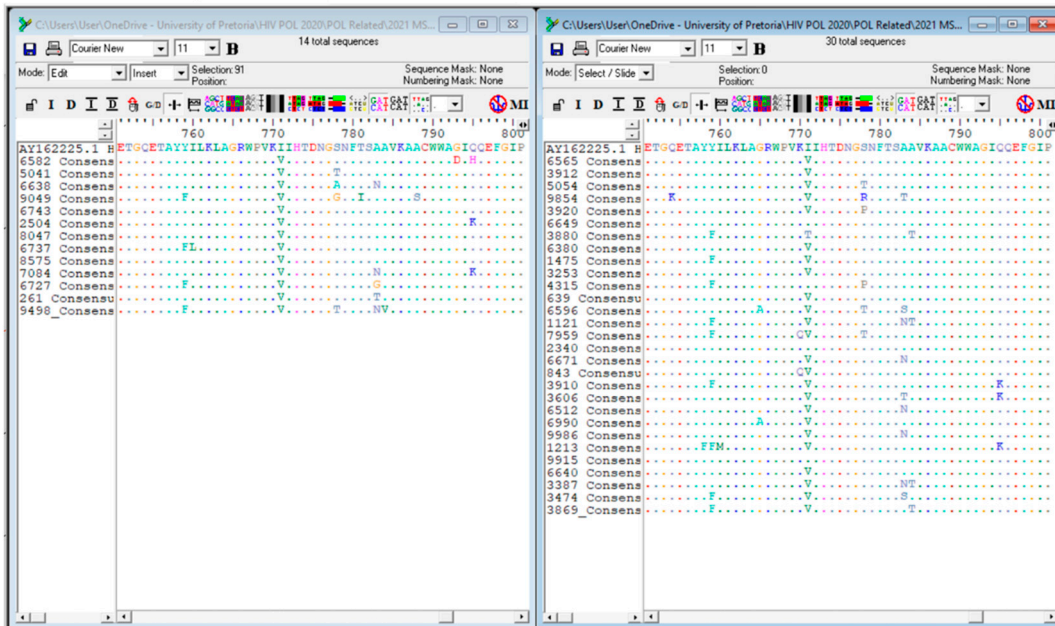

801-850 window  $p=0,9620$ 

Recent HIV

Chronic HIV

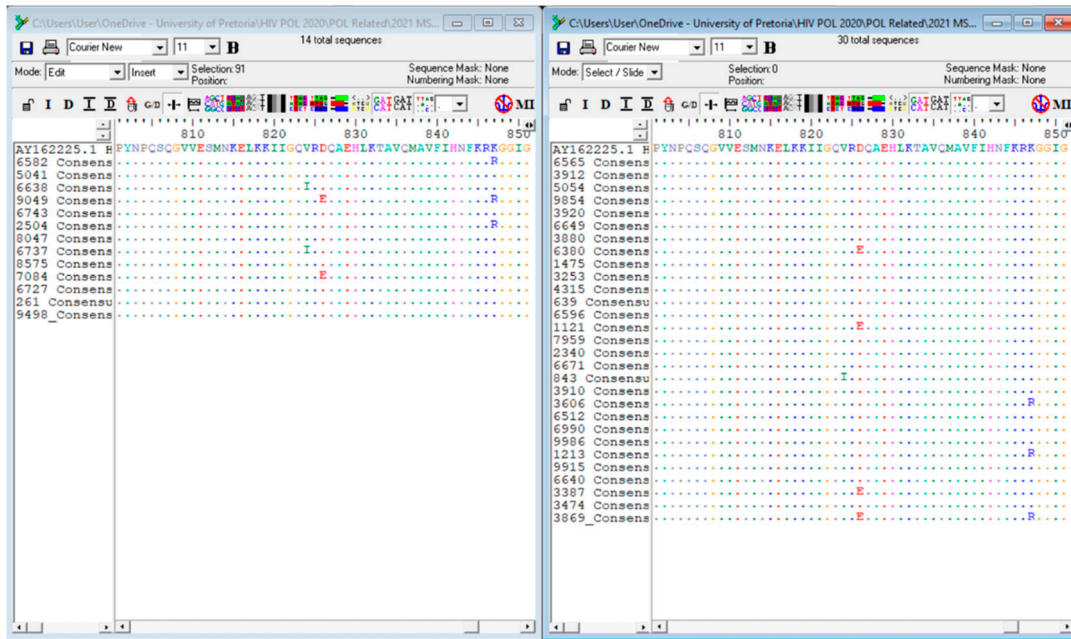851-900 window  $p=0,0569$ 

Recent HIV

Chronic HIV

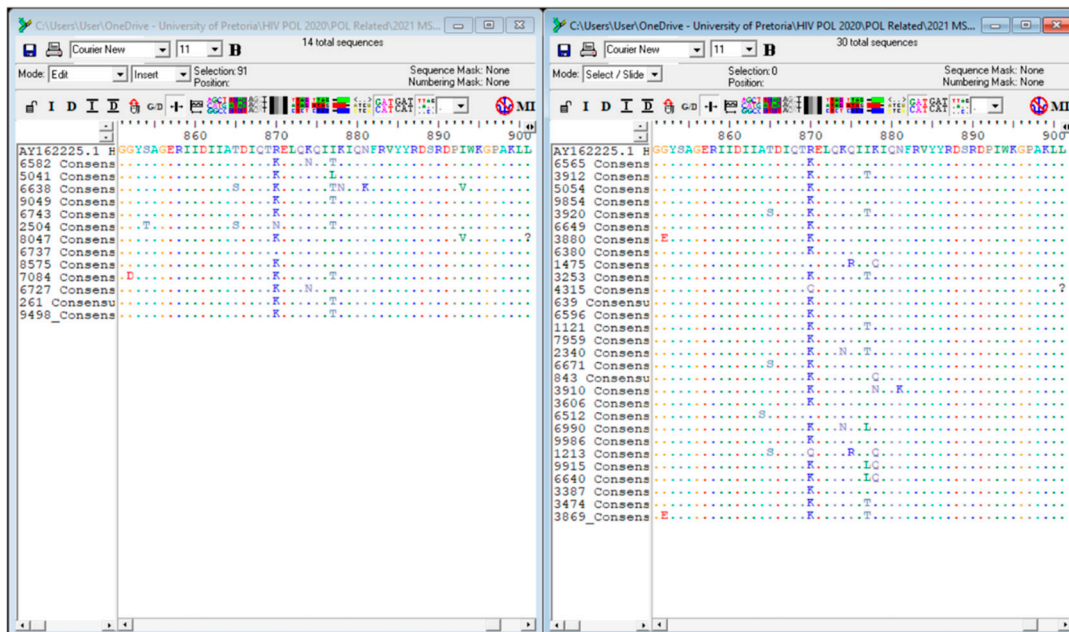

**Supplementary Figure S1:** Amino acid sequence alignment to show the difference in sequences between recent and chronic HIV-1 infection. The differences were shown for all sliding windows. Positions that showed a significant difference were highlighted in red.
